# Supplementary material for: Surface ozone and its precursors at Summit, Greenland: comparison between observations and model simulations
Source: Copernicus journal article supplement (doi:10.5194/acp-17-14661-2017), 2017-12-08
Supplement: Supplementary file 1 [file acp-17-14661-2017-supplement.pdf]

Supplement of Atmos. Chem. Phys., 17, 14661–14674, 2017  
<https://doi.org/10.5194/acp-17-14661-2017-supplement>  
© Author(s) 2017. This work is distributed under  
the Creative Commons Attribution 3.0 License.

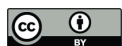

*Supplement of*

## **Surface ozone and its precursors at Summit, Greenland: comparison between observations and model simulations**

**Yaoxian Huang et al.**

*Correspondence to:* Shiliang Wu (slwu@mtu.edu) and Yaoxian Huang (yaoxianh@mtu.edu)

The copyright of individual parts of the supplement might differ from the CC BY 3.0 License.

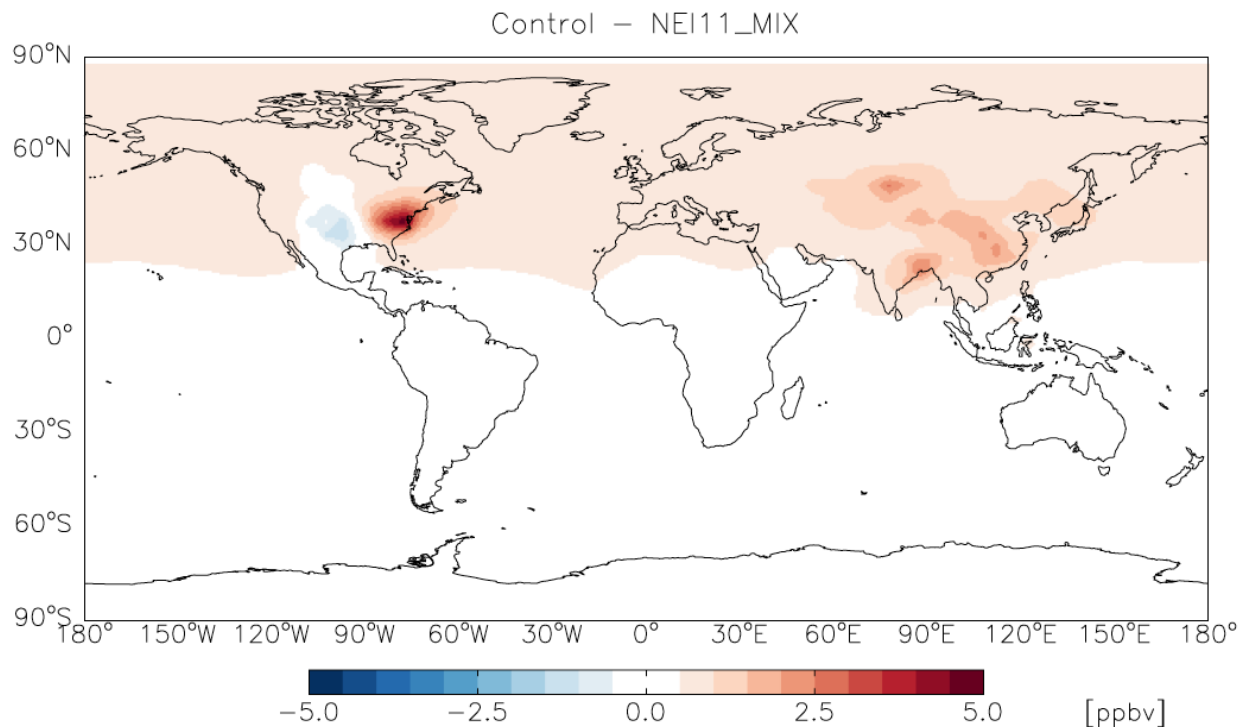

**Figure S1.** Differences of global annual mean surface  $C_2H_6$  mixing ratios between GEOS-Chem model control simulations and NEI11\_MIX runs during 07/2008-06/2010. NEI11\_MIX represents model perturbations with global  $C_2H_6$  emission inventories overwritten by NEI11 over US and by MIX over Asia, with other model configurations identical to the control simulations. See text for details.
